# Supplementary material
Source: publisher figshare collection journal article supplement (https://asha.figshare.com/articles/dataset/_/9755459)
Supplement: Supplementary file 1 [file 1]

# Supplemental Material S1. Cross-tabulation of all responses by years of experience to Item 13: Check how frequently you have used the following approaches to treat CAS.

| Variable | Group       | Rating (1 = not familiar, 2 = never, 6= always) |        |          |          |          |          |         | Total   | $\tau_b$ | $p$ |
|----------|-------------|-------------------------------------------------|--------|----------|----------|----------|----------|---------|---------|----------|-----|
|          |             |                                                 | 1      | 2        | 3        | 4        | 5        | 6       |         |          |     |
| PROMPT   | 1-5 years   | n                                               | 1      | 3        | 3        | 5        | 14       | 6       | 32      |          |     |
|          |             | %                                               | 3.10%  | 9.40%    | 9.40%    | 15.60%   | 43.80%   | 18.80%  | 100.00% |          |     |
|          | 6-10 years  | n                                               | 1      | 3        | 1        | 7        | 4        | 7       | 23      |          |     |
|          |             | %                                               | 4.30%  | 13.00%   | 4.30%    | 30.40%   | 17.40%   | 30.40%  | 100.00% |          |     |
|          | 11-15 years | n                                               | 0      | 5        | 2        | 1        | 9        | 6       | 23      |          |     |
|          |             | %                                               | 0.00%  | 21.70%   | 8.70%    | 4.30%    | 39.10%   | 26.10%  | 100.00% |          |     |
|          | 15+ years   | n                                               | 2      | 19       | 10       | 17       | 20       | 15      | 83      |          |     |
|          |             | %                                               | 2.40%  | 22.90%   | 12.00%   | 20.50%   | 24.10%   | 18.10%  | 100.00% |          |     |
|          | Total       | n                                               | 4      | 30       | 16       | 30       | 47       | 34      | 161     |          |     |
|          |             | %                                               | 2.50%  | 18.60%   | 9.90%    | 18.60%   | 29.20%   | 21.10%  | 100.00% | -.118    | .06 |
| OPT      | 1-5 years   | n                                               | 2      | 4        | 8        | 6        | 8        | 4       | 32      |          |     |
|          |             | %                                               | 6.30%  | 12.50%   | 25.00%   | 18.80%   | 25.00%   | 12.50%  | 100.00% |          |     |
|          | 6-10 years  | n                                               | 2      | 2        | 2        | 6        | 7        | 4       | 23      |          |     |
|          |             | %                                               | 8.70%  | 8.70%    | 8.70%    | 26.10%   | 30.40%   | 17.40%  | 100.00% |          |     |
|          | 11-15 years | n                                               | 3      | 5        | 0        | 4        | 9        | 2       | 23      |          |     |
|          |             | %                                               | 13.00% | 21.70%   | 0.00%    | 17.40%   | 39.10%   | 8.70%   | 100.00% |          |     |
|          | 15+ years   | n                                               | 5      | 10       | 5        | 35       | 24       | 7       | 86      |          |     |
|          |             | %                                               | 5.80%  | 11.60%   | 5.80%    | 40.70%   | 27.90%   | 8.10%   | 100.00% |          |     |
|          | Total       | n                                               | 12     | 21       | 15       | 51       | 48       | 17      | 164     |          |     |
|          |             | %                                               | 7.30%  | 12.80%   | 9.10%    | 31.10%   | 29.30%   | 10.40%  | 100.00% | .008     | .90 |
| MinPair  | 1-5 years   | n                                               | 0      | 700.00%  | 800.00%  | 1000.00% | 700.00%  | 0.00%   | 32      |          |     |
|          |             | %                                               | 0.00%  | 21.90%   | 25.00%   | 31.30%   | 21.90%   | 0.00%   | 100.00% |          |     |
|          | 6-10 years  | n                                               | 0      | 200.00%  | 800.00%  | 300.00%  | 900.00%  | 0.00%   | 22      |          |     |
|          |             | %                                               | 0.00%  | 9.10%    | 36.40%   | 13.60%   | 40.90%   | 0.00%   | 100.00% |          |     |
|          | 11-15 years | n                                               | 0      | 500.00%  | 600.00%  | 500.00%  | 600.00%  | 100.00% | 23      |          |     |
|          |             | %                                               | 0.00%  | 21.70%   | 26.10%   | 21.70%   | 26.10%   | 4.30%   | 100.00% |          |     |
|          | 15+ years   | n                                               | 0      | 800.00%  | 2200.00% | 3400.00% | 2000.00% | 100.00% | 85      |          |     |
|          |             | %                                               | 0.00%  | 9.40%    | 25.90%   | 40.00%   | 23.50%   | 1.20%   | 100.00% |          |     |
|          | Total       | n                                               | 0      | 2200.00% | 4400.00% | 5200.00% | 4200.00% | 200.00% | 162     |          |     |
|          |             | %                                               | 0.00%  | 13.60%   | 27.20%   | 32.10%   | 25.90%   | 1.20%   | 100.00% | .064     | .33 |
| Cycles   | 1-5 years   | n                                               | 1      | 7        | 8        | 8        | 7        | 0       | 31      |          |     |
|          |             | %                                               | 3.20%  | 22.60%   | 25.80%   | 25.80%   | 22.60%   | 0.00%   | 100.00% |          |     |
|          | 6-10 years  | n                                               | 1      | 6        | 8        | 3        | 5        | 0       | 23      |          |     |
|          |             | %                                               | 4.30%  | 26.10%   | 34.80%   | 13.00%   | 21.70%   | 0.00%   | 100.00% |          |     |
|          | 11-15 years | n                                               | 1      | 8        | 5        | 3        | 5        | 1       | 23      |          |     |
|          |             | %                                               | 4.30%  | 34.80%   | 21.70%   | 13.00%   | 21.70%   | 4.30%   | 100.00% |          |     |

| Variable | Group       | Rating (1 = <i>not familiar</i> , 2 = <i>never</i> , 6= <i>always</i> ) |        |        |        |        |        |         | Total   | T <sub>b</sub> | p |
|----------|-------------|-------------------------------------------------------------------------|--------|--------|--------|--------|--------|---------|---------|----------------|---|
|          |             | 1                                                                       | 2      | 3      | 4      | 5      | 6      |         |         |                |   |
|          | 15+ years   | %                                                                       | 4.30%  | 34.80% | 21.70% | 13.00% | 21.70% | 4.30%   | 100.00% |                |   |
|          |             | n                                                                       | 12     | 25     | 18     | 22     | 10     | 0       | 87      |                |   |
|          | %           | 13.80%                                                                  | 28.70% | 20.70% | 25.30% | 11.50% | 0.00%  | 100.00% |         |                |   |
|          | Total       | n                                                                       | 15     | 46     | 39     | 36     | 27     | 1       | 164     |                |   |
|          | %           | 9.10%                                                                   | 28.00% | 23.80% | 22.00% | 16.50% | 0.60%  | 100.00% |         |                |   |
| MaxOpp   | 1-5 years   | n                                                                       | 10     | 9      | 6      | 2      | 5      | 0       | 32      |                |   |
|          |             | %                                                                       | 31.30% | 28.10% | 18.80% | 6.30%  | 15.60% | 0.00%   | 100.00% |                |   |
|          | 6-10 years  | n                                                                       | 12     | 7      | 3      | 0      | 1      | 0       | 23      |                |   |
|          |             | %                                                                       | 52.20% | 30.40% | 13.00% | 0.00%  | 4.30%  | 0.00%   | 100.00% |                |   |
|          | 11-15 years | n                                                                       | 7      | 8      | 3      | 3      | 1      | 1       | 23      |                |   |
|          |             | %                                                                       | 30.40% | 34.80% | 13.00% | 13.00% | 4.30%  | 4.30%   | 100.00% |                |   |
|          | 15+ years   | n                                                                       | 40     | 15     | 14     | 14     | 3      | 0       | 86      |                |   |
|          |             | %                                                                       | 46.50% | 17.40% | 16.30% | 16.30% | 3.50%  | 0.00%   | 100.00% |                |   |
|          | Total       | n                                                                       | 69     | 39     | 26     | 19     | 10     | 1       | 164     |                |   |
|          |             | %                                                                       | 42.10% | 23.80% | 15.90% | 11.60% | 6.10%  | 0.60%   | 100.00% |                |   |
| PhonCom  | 1-5 years   | n                                                                       | 15     | 8      | 3      | 3      | 2      | 0       | 31      |                |   |
|          |             | %                                                                       | 48.40% | 25.80% | 9.70%  | 9.70%  | 6.50%  | 0.00%   | 100.00% |                |   |
|          | 6-10 years  | n                                                                       | 7      | 5      | 1      | 8      | 2      | 0       | 23      |                |   |
|          |             | %                                                                       | 30.40% | 21.70% | 4.30%  | 34.80% | 8.70%  | 0.00%   | 100.00% |                |   |
|          | 11-15 years | n                                                                       | 6      | 4      | 4      | 3      | 5      | 1       | 23      |                |   |
|          |             | %                                                                       | 26.10% | 17.40% | 17.40% | 13.00% | 21.70% | 4.30%   | 100.00% |                |   |
|          | 15+ years   | n                                                                       | 20     | 18     | 11     | 25     | 12     | 1       | 87      |                |   |
|          |             | %                                                                       | 23.00% | 20.70% | 12.60% | 28.70% | 13.80% | 1.10%   | 100.00% |                |   |
|          | Total       | n                                                                       | 48     | 35     | 19     | 39     | 21     | 2       | 164     |                |   |
|          |             | %                                                                       | 29.30% | 21.30% | 11.60% | 23.80% | 12.80% | 1.20%   | 100.00% |                |   |
| DistFeat | 1-5 years   | n                                                                       | 10     | 10     | 3      | 5      | 4      | 0       | 32      |                |   |
|          |             | %                                                                       | 31.30% | 31.30% | 9.40%  | 15.60% | 12.50% | 0.00%   | 100.00% |                |   |
|          | 6-10 years  | n                                                                       | 4      | 5      | 1      | 10     | 3      | 0       | 23      |                |   |
|          |             | %                                                                       | 17.40% | 21.70% | 4.30%  | 43.50% | 13.00% | 0.00%   | 100.00% |                |   |
|          | 11-15 years | n                                                                       | 6      | 4      | 3      | 4      | 6      | 0       | 23      |                |   |
|          |             | %                                                                       | 26.10% | 17.40% | 13.00% | 17.40% | 26.10% | 0.00%   | 100.00% |                |   |
|          | 15+ years   | n                                                                       | 8      | 26     | 15     | 23     | 13     | 1       | 86      |                |   |
|          |             | %                                                                       | 9.30%  | 30.20% | 17.40% | 26.70% | 15.10% | 1.20%   | 100.00% |                |   |
|          | Total       | n                                                                       | 28     | 45     | 22     | 42     | 26     | 1       | 164     |                |   |
|          |             | %                                                                       | 17.10% | 27.40% | 13.40% | 25.60% | 15.90% | 0.60%   | 100.00% |                |   |
| Metaphon | 1-5 years   | n                                                                       | 21     | 5      | 3      | 2      | 0      | 0       | 31      |                |   |
|          |             | %                                                                       | 67.70% | 16.10% | 9.70%  | 6.50%  | 0.00%  | 0.00%   | 100.00% |                |   |
|          | 6-10 years  | n                                                                       | 13     | 6      | 1      | 1      | 2      | 0       | 23      |                |   |

| Variable | Group       | Rating (1 = <i>not familiar</i> , 2 = <i>never</i> , 6 = <i>always</i> ) |        |        |        |        |        | Total  | $\tau_b$ | $p$   |
|----------|-------------|--------------------------------------------------------------------------|--------|--------|--------|--------|--------|--------|----------|-------|
|          |             | 1                                                                        | 2      | 3      | 4      | 5      | 6      |        |          |       |
|          | 11-15 years | %                                                                        | 56.50% | 26.10% | 4.30%  | 4.30%  | 8.70%  | 0.00%  | 100.00%  |       |
|          |             | n                                                                        | 16     | 5      | 1      | 0      | 0      | 0      | 22       |       |
|          | 15+ years   | %                                                                        | 72.70% | 22.70% | 4.50%  | 0.00%  | 0.00%  | 0.00%  | 100.00%  |       |
|          |             | n                                                                        | 58     | 19     | 4      | 4      | 2      | 0      | 87       |       |
|          | Total       | %                                                                        | 66.70% | 21.80% | 4.60%  | 4.60%  | 2.30%  | 0.00%  | 100.00%  |       |
|          |             | n                                                                        | 108    | 35     | 9      | 7      | 4      | 0      | 163      |       |
| WholeLan | 1-5 years   | %                                                                        | 66.30% | 21.50% | 5.50%  | 4.30%  | 2.50%  | 0.00%  | 100.00%  | -.020 |
|          |             | n                                                                        | 108    | 35     | 9      | 7      | 4      | 0      | 163      | .78   |
|          | 6-10 years  | %                                                                        | 12.90% | 16.10% | 9.70%  | 38.70% | 16.10% | 6.50%  | 100.00%  |       |
|          |             | n                                                                        | 4      | 5      | 3      | 12     | 5      | 2      | 31       |       |
|          | 11-15 years | %                                                                        | 13.00% | 26.10% | 17.40% | 30.40% | 8.70%  | 4.30%  | 100.00%  |       |
|          |             | n                                                                        | 3      | 6      | 4      | 7      | 2      | 1      | 23       |       |
|          | 15+ years   | %                                                                        | 18.20% | 27.30% | 18.20% | 4.50%  | 31.80% | 0.00%  | 100.00%  |       |
|          |             | n                                                                        | 9      | 27     | 11     | 18     | 15     | 5      | 85       |       |
|          | Total       | %                                                                        | 10.60% | 31.80% | 12.90% | 21.20% | 17.60% | 5.90%  | 100.00%  |       |
|          |             | n                                                                        | 20     | 44     | 22     | 38     | 29     | 8      | 161      |       |
| Sensmot  | 1-5 years   | %                                                                        | 12.40% | 27.30% | 13.70% | 23.60% | 18.00% | 5.00%  | 100.00%  | -.033 |
|          |             | n                                                                        | 20     | 44     | 22     | 38     | 29     | 8      | 161      | .61   |
|          | 6-10 years  | %                                                                        | 12.50% | 15.60% | 9.40%  | 37.50% | 15.60% | 9.40%  | 100.00%  |       |
|          |             | n                                                                        | 2      | 1      | 5      | 4      | 4      | 7      | 23       |       |
|          | 11-15 years | %                                                                        | 8.70%  | 4.30%  | 21.70% | 17.40% | 17.40% | 30.40% | 100.00%  |       |
|          |             | n                                                                        | 1      | 2      | 1      | 9      | 8      | 1      | 22       |       |
|          | 15+ years   | %                                                                        | 4.50%  | 9.10%  | 4.50%  | 40.90% | 36.40% | 4.50%  | 100.00%  |       |
|          |             | n                                                                        | 7      | 9      | 17     | 16     | 23     | 11     | 83       |       |
|          | Total       | %                                                                        | 8.40%  | 10.80% | 20.50% | 19.30% | 27.70% | 13.30% | 100.00%  |       |
|          |             | n                                                                        | 14     | 17     | 26     | 41     | 40     | 22     | 160      |       |
| DTTC     | 1-5 years   | %                                                                        | 8.80%  | 10.60% | 16.30% | 25.60% | 25.00% | 13.80% | 100.00%  | .021  |
|          |             | n                                                                        | 14     | 17     | 26     | 41     | 40     | 22     | 160      | .76   |
|          | 6-10 years  | %                                                                        | 37.50% | 15.60% | 3.10%  | 15.60% | 21.90% | 6.30%  | 100.00%  |       |
|          |             | n                                                                        | 9      | 2      | 0      | 4      | 5      | 3      | 23       |       |
|          | 11-15 years | %                                                                        | 39.10% | 8.70%  | 0.00%  | 17.40% | 21.70% | 13.00% | 100.00%  |       |
|          |             | n                                                                        | 9      | 0      | 0      | 8      | 4      | 2      | 23       |       |
|          | 15+ years   | %                                                                        | 39.10% | 0.00%  | 0.00%  | 34.80% | 17.40% | 8.70%  | 100.00%  |       |
|          |             | n                                                                        | 31     | 7      | 2      | 13     | 22     | 11     | 86       |       |
|          | Total       | %                                                                        | 36.00% | 8.10%  | 2.30%  | 15.10% | 25.60% | 12.80% | 100.00%  |       |
|          |             | n                                                                        | 61     | 14     | 3      | 30     | 38     | 18     | 164      |       |
| AudBom   | 1-5 years   | %                                                                        | 37.20% | 8.50%  | 1.80%  | 18.30% | 23.20% | 11.00% | 100.00%  | .056  |
|          |             | n                                                                        | 1      | 5      | 8      | 8      | 6      | 4      | 32       | .39   |

| Variable | Group       | Rating (1 = <i>not familiar</i> , 2 = <i>never</i> , 6 = <i>always</i> ) |        |        |        |        |        | Total  | $\tau_b$ | $p$ |
|----------|-------------|--------------------------------------------------------------------------|--------|--------|--------|--------|--------|--------|----------|-----|
|          |             | 1                                                                        | 2      | 3      | 4      | 5      | 6      |        |          |     |
|          | 6-10 years  | %                                                                        | 3.10%  | 15.60% | 25.00% | 25.00% | 18.80% | 12.50% | 100.00%  |     |
|          |             | n                                                                        | 3      | 3      | 8      | 6      | 3      | 0      | 23       |     |
|          | 11-15 years | %                                                                        | 13.00% | 13.00% | 34.80% | 26.10% | 13.00% | 0.00%  | 100.00%  |     |
|          |             | n                                                                        | 0      | 7      | 1      | 9      | 3      | 2      | 22       |     |
|          | 15+ years   | %                                                                        | 0.00%  | 31.80% | 4.50%  | 40.90% | 13.60% | 9.10%  | 100.00%  |     |
|          |             | n                                                                        | 0      | 23     | 21     | 20     | 20     | 3      | 87       |     |
|          | Total       | %                                                                        | 0.00%  | 26.40% | 24.10% | 23.00% | 23.00% | 3.40%  | 100.00%  |     |
|          |             | n                                                                        | 4      | 38     | 38     | 43     | 32     | 9      | 164      |     |
| NSOME    | 1-5 years   | %                                                                        | 2.40%  | 23.20% | 23.20% | 26.20% | 19.50% | 5.50%  | 100.00%  |     |
|          |             | n                                                                        | 2      | 19     | 6      | 4      | 1      | 0      | 32       |     |
|          | 6-10 years  | %                                                                        | 6.30%  | 59.40% | 18.80% | 12.50% | 3.10%  | 0.00%  | 100.00%  |     |
|          |             | n                                                                        | 2      | 10     | 6      | 3      | 2      | 0      | 23       |     |
|          | 11-15 years | %                                                                        | 8.70%  | 43.50% | 26.10% | 13.00% | 8.70%  | 0.00%  | 100.00%  |     |
|          |             | n                                                                        | 0      | 12     | 3      | 7      | 0      | 1      | 23       |     |
|          | 15+ years   | %                                                                        | 0.00%  | 52.20% | 13.00% | 30.40% | 0.00%  | 4.30%  | 100.00%  |     |
|          |             | n                                                                        | 3      | 40     | 13     | 13     | 15     | 2      | 86       |     |
| Kauff    | 1-5 years   | %                                                                        | 3.50%  | 46.50% | 15.10% | 15.10% | 17.40% | 2.30%  | 100.00%  |     |
|          |             | n                                                                        | 7      | 81     | 28     | 27     | 18     | 3      | 164      |     |
|          | 6-10 years  | %                                                                        | 4.30%  | 49.40% | 17.10% | 16.50% | 11.00% | 1.80%  | 100.00%  |     |
|          |             | n                                                                        | 2      | 6      | 1      | 5      | 15     | 3      | 32       |     |
|          | 11-15 years | %                                                                        | 6.30%  | 18.80% | 3.10%  | 15.60% | 46.90% | 9.40%  | 100.00%  |     |
|          |             | n                                                                        | 1      | 2      | 0      | 5      | 11     | 4      | 23       |     |
|          | 15+ years   | %                                                                        | 4.30%  | 8.70%  | 0.00%  | 21.70% | 47.80% | 17.40% | 100.00%  |     |
|          |             | n                                                                        | 0      | 3      | 3      | 3      | 12     | 2      | 23       |     |
| VanRip   | 1-5 years   | %                                                                        | 0.00%  | 13.00% | 13.00% | 13.00% | 52.20% | 8.70%  | 100.00%  |     |
|          |             | n                                                                        | 4      | 17     | 8      | 16     | 33     | 9      | 87       |     |
|          | 6-10 years  | %                                                                        | 4.60%  | 19.50% | 9.20%  | 18.40% | 37.90% | 10.30% | 100.00%  |     |
|          |             | n                                                                        | 7      | 28     | 12     | 29     | 71     | 18     | 165      |     |
|          | 11-15 years | %                                                                        | 4.20%  | 17.00% | 7.30%  | 17.60% | 43.00% | 10.90% | 100.00%  |     |
|          |             | n                                                                        | 2      | 13     | 11     | 1      | 5      | 0      | 32       |     |
|          | 15+ years   | %                                                                        | 6.30%  | 40.60% | 34.40% | 3.10%  | 15.60% | 0.00%  | 100.00%  |     |
|          |             | n                                                                        | 4      | 5      | 5      | 6      | 3      | 0      | 23       |     |
|          | 1-5 years   | %                                                                        | 17.40% | 21.70% | 21.70% | 26.10% | 13.00% | 0.00%  | 100.00%  |     |
|          |             | n                                                                        | 6      | 11     | 2      | 3      | 1      | 0      | 23       |     |
|          | 6-10 years  | %                                                                        | 26.10% | 47.80% | 8.70%  | 13.00% | 4.30%  | 0.00%  | 100.00%  |     |
|          |             | n                                                                        | 9      | 26     | 23     | 19     | 10     | 0      | 87       |     |
|          | 11-15 years | %                                                                        | 10.30% | 29.90% | 26.40% | 21.80% | 11.50% | 0.00%  | 100.00%  |     |
|          |             | n                                                                        | 4      | 26     | 23     | 19     | 10     | 0      | 87       |     |
|          | 15+ years   | %                                                                        | 10.30% | 29.90% | 26.40% | 21.80% | 11.50% | 0.00%  | 100.00%  |     |
|          |             | n                                                                        | 4      | 26     | 23     | 19     | 10     | 0      | 87       |     |

| Variable | Group | Rating (1 = <i>not familiar</i> , 2 = <i>never</i> , 6= <i>always</i> ) |        |        |        |        |        |       | Total   | $\tau_b$ | $p$ |
|----------|-------|-------------------------------------------------------------------------|--------|--------|--------|--------|--------|-------|---------|----------|-----|
|          |       | 1                                                                       | 2      | 3      | 4      | 5      | 6      |       |         |          |     |
|          | Total | n                                                                       | 21     | 55     | 41     | 29     | 19     | 0     | 165     |          |     |
|          |       | %                                                                       | 12.70% | 33.30% | 24.80% | 17.60% | 11.50% | 0.00% | 100.00% | .058     | .36 |

\* $p < .05$ , \*\* $p < .01$ , \*\*\* $p < .001$ ; % = within group percent

OPT = oral placement therapy; MinPair = minimal pairs; MaxOpp = maximal oppositions; PhonCom = phonological complexity approach; DistFeat = distinctive features; Metaph = Metaphon; WholeLan = whole language; SensMot = sensory motor; DTTC = dynamic tactile temporal cueing; AudBomb = auditory bombardment; NSOME = nonspeech oral motor exercises; Kauff = Kauffman approach; VanRip = traditional Van Riper approach.
