# Supplementary material
Source: publisher figshare collection journal article supplement (https://asha.figshare.com/articles/dataset/_/9755459)
Supplement: Supplementary file 2 [file 1]

**Supplemental Material S3.** Cross-tabulation of responses by years of experience to Item 17: Please rate the degree to which the following influence your perspective on pediatric speech sound disorders.

| Variable   | Group       | Rating (1 = <i>not at all</i> , 5 = <i>a great deal</i> ) |        |        |        |        |        | Total   | $\tau_b$ | $p$ |
|------------|-------------|-----------------------------------------------------------|--------|--------|--------|--------|--------|---------|----------|-----|
|            |             |                                                           | 1      | 2      | 3      | 4      | 5      |         |          |     |
| University | 1-5 years   | n                                                         | 0      | 6      | 13     | 11     | 2      | 32      |          |     |
|            |             | %                                                         | 0.00%  | 18.80% | 40.60% | 34.40% | 6.30%  | 100.00% |          |     |
|            | 6-10 years  | n                                                         | 2      | 4      | 8      | 7      | 2      | 23      |          |     |
|            |             | %                                                         | 8.70%  | 17.40% | 34.80% | 30.40% | 8.70%  | 100.00% |          |     |
|            | 11-15 years | n                                                         | 3      | 4      | 12     | 3      | 1      | 23      |          |     |
|            |             | %                                                         | 13.00% | 17.40% | 52.20% | 13.00% | 4.30%  | 100.00% |          |     |
|            | 15+ years   | n                                                         | 9      | 15     | 33     | 16     | 13     | 86      |          |     |
|            |             | %                                                         | 10.50% | 17.40% | 38.40% | 18.60% | 15.10% | 100.00% |          |     |
|            | Total       | n                                                         | 14     | 29     | 66     | 37     | 18     | 164     |          |     |
|            |             | %                                                         | 8.50%  | 17.70% | 40.20% | 22.60% | 11.00% | 100.00% | .046     | .58 |
| CEU        | 1-5 years   | n                                                         | 1      | 1      | 4      | 12     | 14     | 32      |          |     |
|            |             | %                                                         | 3.10%  | 3.10%  | 12.50% | 37.50% | 43.80% | 100.00% |          |     |
|            | 6-10 years  | n                                                         | 1      | 0      | 1      | 7      | 14     | 23      |          |     |
|            |             | %                                                         | 4.30%  | 0.00%  | 4.30%  | 30.40% | 60.90% | 100.00% |          |     |
|            | 11-15 years | n                                                         | 0      | 0      | 1      | 2      | 20     | 23      |          |     |
|            |             | %                                                         | 0.00%  | 0.00%  | 4.30%  | 8.70%  | 87.00% | 100.00% |          |     |
|            | 15+ years   | n                                                         | 1      | 1      | 6      | 23     | 55     | 86      |          |     |
|            |             | %                                                         | 1.20%  | 1.20%  | 7.00%  | 26.70% | 64.00% | 100.00% |          |     |
|            | Total       | n                                                         | 3      | 2      | 12     | 44     | 103    | 164     |          |     |
|            |             | %                                                         | 1.80%  | 1.20%  | 7.30%  | 26.80% | 62.80% | 100.00% | -.059    | .47 |
| Experience | 1-5 years   | n                                                         | 0      | 0      | 3      | 14     | 15     | 32      |          |     |
|            |             | %                                                         | 0.00%  | 0.00%  | 9.40%  | 43.80% | 46.90% | 100.00% |          |     |
|            | 6-10 years  | n                                                         | 0      | 0      | 1      | 4      | 18     | 23      |          |     |
|            |             | %                                                         | 0.00%  | 0.00%  | 4.30%  | 17.40% | 78.30% | 100.00% |          |     |
|            | 11-15 years | n                                                         | 0      | 0      | 0      | 5      | 18     | 23      |          |     |
|            |             | %                                                         | 0.00%  | 0.00%  | 0.00%  | 21.70% | 78.30% | 100.00% |          |     |
|            | 15+ years   | n                                                         | 0      | 0      | 3      | 22     | 61     | 86      |          |     |
|            |             | %                                                         | 0.00%  | 0.00%  | 3.50%  | 25.60% | 70.90% | 100.00% |          |     |
|            | Total       | n                                                         | 0      | 0      | 7      | 45     | 112    | 164     |          |     |
|            |             | %                                                         | 0.00%  | 0.00%  | 4.30%  | 27.40% | 68.30% | 100.00% | -.073    | .38 |
| SLPLit     | 1-5 years   | n                                                         | 0      | 2      | 15     | 10     | 5      | 32      |          |     |
|            |             | %                                                         | 0.00%  | 6.30%  | 46.90% | 31.30% | 15.60% | 100.00% |          |     |
|            | 6-10 years  | n                                                         | 0      | 4      | 4      | 10     | 5      | 23      |          |     |
|            |             | %                                                         | 0.00%  | 17.40% | 17.40% | 43.50% | 21.70% | 100.00% |          |     |
|            | 11-15 years | n                                                         | 0      | 2      | 5      | 9      | 7      | 23      |          |     |

| Variable | Group       | Rating (1 = <i>not at all</i> , 5 = <i>a great deal</i> ) |        |        |        |        | Total  | $\tau_b$ | $p$      |
|----------|-------------|-----------------------------------------------------------|--------|--------|--------|--------|--------|----------|----------|
|          |             | 1                                                         | 2      | 3      | 4      | 5      |        |          |          |
| OtherLit |             | %                                                         | 0.00%  | 8.70%  | 21.70% | 39.10% | 30.40% | 100.00%  |          |
|          | 15+ years   | n                                                         | 1      | 6      | 16     | 33     | 30     | 86       |          |
|          |             | %                                                         | 1.20%  | 7.00%  | 18.60% | 38.40% | 34.90% | 100.00%  |          |
|          | Total       | n                                                         | 1      | 14     | 40     | 62     | 47     | 164      |          |
|          |             | %                                                         | 0.60%  | 8.50%  | 24.40% | 37.80% | 28.70% | 100.00%  | .094 .23 |
|          | 1-5 years   | n                                                         | 10     | 5      | 11     | 4      | 2      | 32       |          |
|          |             | %                                                         | 31.30% | 15.60% | 34.40% | 12.50% | 6.30%  | 100.00%  |          |
|          | 6-10 years  | n                                                         | 2      | 8      | 8      | 4      | 1      | 23       |          |
|          |             | %                                                         | 8.70%  | 34.80% | 34.80% | 17.40% | 4.30%  | 100.00%  |          |
|          | 11-15 years | n                                                         | 5      | 3      | 8      | 6      | 1      | 23       |          |
| Opinion  |             | %                                                         | 21.70% | 13.00% | 34.80% | 26.10% | 4.30%  | 100.00%  |          |
|          | 15+ years   | n                                                         | 8      | 26     | 29     | 16     | 7      | 86       |          |
|          |             | %                                                         | 9.30%  | 30.20% | 33.70% | 18.60% | 8.10%  | 100.00%  |          |
|          | Total       | n                                                         | 25     | 42     | 56     | 30     | 11     | 164      |          |
|          |             | %                                                         | 15.20% | 25.60% | 34.10% | 18.30% | 6.70%  | 100.00%  | .005 .95 |
|          | 1-5 years   | n                                                         | 7      | 6      | 15     | 3      | 1      | 32       |          |
|          |             | %                                                         | 21.90% | 18.80% | 46.90% | 9.40%  | 3.10%  | 100.00%  |          |
|          | 6-10 years  | n                                                         | 6      | 12     | 5      | 0      | 0      | 23       |          |
|          |             | %                                                         | 26.10% | 52.20% | 21.70% | 0.00%  | 0.00%  | 100.00%  |          |
|          | 11-15 years | n                                                         | 6      | 5      | 6      | 3      | 3      | 23       |          |
|          |             | %                                                         | 26.10% | 21.70% | 26.10% | 13.00% | 13.00% | 100.00%  |          |
|          | 15+ years   | n                                                         | 14     | 28     | 27     | 13     | 4      | 86       |          |
|          |             | %                                                         | 16.30% | 32.60% | 31.40% | 15.10% | 4.70%  | 100.00%  |          |
|          | Total       | n                                                         | 33     | 51     | 53     | 19     | 8      | 164      |          |
|          |             | %                                                         | 20.10% | 31.10% | 32.30% | 11.60% | 4.90%  | 100.00%  | .136 .12 |

\* $p < .05$ , \*\* $p < .01$ , \*\*\* $p < .001$

University = graduate-level university courses; CEU = continuing education courses; ClinExp = own clinical experience; SLPLit = scientific literature in speech-language pathology; OtherLit = scientific literature outside speech-language pathology; Opinion = clinical opinions outside peer-reviewed resources.
