# Supplementary material
Source: publisher figshare collection journal article supplement (https://asha.figshare.com/articles/dataset/_/9755459)
Supplement: Supplementary file 3 [file 1]

**Supplemental Material S2.** Cross-tabulation of responses by years of experience for Item 16: How indicative are these characteristics and considerations CAS over other pediatric speech sound disorders?

|          |             | Rating (1 = <i>not indicative</i> , 5 = <i>very indicative</i> ) |        |        |        |        |        |         |          |     |
|----------|-------------|------------------------------------------------------------------|--------|--------|--------|--------|--------|---------|----------|-----|
| Variable | Group       |                                                                  | 1      | 2      | 3      | 4      | 5      | Total   | $\tau_b$ | $p$ |
| NonSp    | 1-5 years   | n                                                                | 9      | 8      | 10     | 4      | 1      | 32      | .065     | .32 |
|          |             | %                                                                | 28.10% | 25.00% | 31.30% | 12.50% | 3.10%  | 100.00% |          |     |
|          | 6-10 years  | n                                                                | 6      | 8      | 5      | 1      | 3      | 23      |          |     |
|          |             | %                                                                | 26.10% | 34.80% | 21.70% | 4.30%  | 13.00% | 100.00% |          |     |
|          | 11-15 years | n                                                                | 4      | 8      | 4      | 5      | 2      | 23      |          |     |
|          |             | %                                                                | 17.40% | 34.80% | 17.40% | 21.70% | 8.70%  | 100.00% |          |     |
|          | 15+ years   | n                                                                | 18     | 28     | 14     | 22     | 5      | 87      |          |     |
|          |             | %                                                                | 20.70% | 32.20% | 16.10% | 25.30% | 5.70%  | 100.00% |          |     |
|          | Total       | n                                                                | 37     | 52     | 33     | 32     | 11     | 165     |          |     |
| AudDisc  | 1-5 years   | n                                                                | 12     | 9      | 6      | 5      | 0      | 32      | -.048    | .50 |
|          |             | %                                                                | 37.50% | 28.10% | 18.80% | 15.60% | 0.00%  | 100.00% |          |     |
|          | 6-10 years  | n                                                                | 10     | 5      | 7      | 1      | 0      | 23      |          |     |
|          |             | %                                                                | 43.50% | 21.70% | 30.40% | 4.30%  | 0.00%  | 100.00% |          |     |
|          | 11-15 years | n                                                                | 10     | 8      | 3      | 1      | 0      | 22      |          |     |
|          |             | %                                                                | 45.50% | 36.40% | 13.60% | 4.50%  | 0.00%  | 100.00% |          |     |
|          | 15+ years   | n                                                                | 35     | 33     | 12     | 4      | 3      | 87      |          |     |
|          |             | %                                                                | 40.20% | 37.90% | 13.80% | 4.60%  | 3.40%  | 100.00% |          |     |
|          | Total       | n                                                                | 67     | 55     | 28     | 11     | 3      | 164     |          |     |
| OralMot  | 1-5 years   | n                                                                | 3      | 4      | 8      | 9      | 8      | 32      | -.053    | .40 |
|          |             | %                                                                | 9.40%  | 12.50% | 25.00% | 28.10% | 25.00% | 100.00% |          |     |
|          | 6-10 years  | n                                                                | 3      | 3      | 5      | 6      | 6      | 23      |          |     |
|          |             | %                                                                | 13.00% | 13.00% | 21.70% | 26.10% | 26.10% | 100.00% |          |     |
|          | 11-15 years | n                                                                | 5      | 5      | 6      | 3      | 4      | 23      |          |     |
|          |             | %                                                                | 21.70% | 21.70% | 26.10% | 13.00% | 17.40% | 100.00% |          |     |
|          | 15+ years   | n                                                                | 17     | 13     | 16     | 20     | 21     | 87      |          |     |
|          |             | %                                                                | 19.50% | 14.90% | 18.40% | 23.00% | 24.10% | 100.00% |          |     |
|          | Total       | n                                                                | 28     | 25     | 35     | 38     | 39     | 165     |          |     |
| Pattern  | 1-5 years   | n                                                                | 8      | 9      | 7      | 4      | 4      | 32      |          |     |
|          |             | %                                                                | 25.00% | 28.10% | 21.90% | 12.50% | 12.50% | 100.00% |          |     |
|          | 6-10 years  | n                                                                | 8      | 7      | 4      | 4      | 0      | 23      |          |     |

| Rating (1 = <i>not indicative</i> , 5 = <i>very indicative</i> ) |             |   |        |        |        |        |        |         |              |
|------------------------------------------------------------------|-------------|---|--------|--------|--------|--------|--------|---------|--------------|
| Variable                                                         | Group       |   | 1      | 2      | 3      | 4      | 5      | Total   | $\tau_b$ $p$ |
| Incons                                                           |             | % | 34.80% | 30.40% | 17.40% | 17.40% | 0.00%  | 100.00% |              |
|                                                                  | 11-15 years | n | 12     | 5      | 2      | 3      | 1      | 23      |              |
|                                                                  |             | % | 52.20% | 21.70% | 8.70%  | 13.00% | 4.30%  | 100.00% |              |
|                                                                  | 15+ years   | n | 35     | 20     | 17     | 10     | 5      | 87      |              |
|                                                                  |             | % | 40.20% | 23.00% | 19.50% | 11.50% | 5.70%  | 100.00% |              |
|                                                                  | Total       | n | 63     | 41     | 30     | 21     | 10     | 165     |              |
|                                                                  |             | % | 38.20% | 24.80% | 18.20% | 12.70% | 6.10%  | 100.00% | -.074 .26    |
|                                                                  | 1-5 years   | n | 0      | 0      | 3      | 9      | 20     | 32      |              |
|                                                                  |             | % | 0.00%  | 0.00%  | 9.40%  | 28.10% | 62.50% | 100.00% |              |
|                                                                  | 6-10 years  | n | 0      | 0      | 0      | 10     | 13     | 23      |              |
|                                                                  |             | % | 0.00%  | 0.00%  | 0.00%  | 43.50% | 56.50% | 100.00% |              |
|                                                                  | 11-15 years | n | 0      | 0      | 2      | 7      | 14     | 23      |              |
|                                                                  |             | % | 0.00%  | 0.00%  | 8.70%  | 30.40% | 60.90% | 100.00% |              |
|                                                                  | 15+ years   | n | 0      | 0      | 11     | 27     | 49     | 87      |              |
|                                                                  |             | % | 0.00%  | 0.00%  | 12.60% | 31.00% | 56.30% | 100.00% |              |
| Prosody                                                          | Total       | n | 0      | 0      | 16     | 53     | 96     | 165     |              |
|                                                                  |             | % | 0.00%  | 0.00%  | 9.70%  | 32.10% | 58.20% | 100.00% | -.054 .44    |
|                                                                  | 1-5 years   | n | 0      | 3      | 8      | 6      | 15     | 32      |              |
|                                                                  |             | % | 0.00%  | 9.40%  | 25.00% | 18.80% | 46.90% | 100.00% |              |
|                                                                  | 6-10 years  | n | 0      | 4      | 2      | 5      | 12     | 23      |              |
|                                                                  |             | % | 0.00%  | 17.40% | 8.70%  | 21.70% | 52.20% | 100.00% |              |
|                                                                  | 11-15 years | n | 1      | 3      | 2      | 4      | 13     | 23      |              |
|                                                                  |             | % | 4.30%  | 13.00% | 8.70%  | 17.40% | 56.50% | 100.00% |              |
|                                                                  | 15+ years   | n | 5      | 4      | 12     | 25     | 41     | 87      |              |
|                                                                  |             | % | 5.70%  | 4.60%  | 13.80% | 28.70% | 47.10% | 100.00% |              |
|                                                                  | Total       | n | 6      | 14     | 24     | 40     | 81     | 165     |              |
|                                                                  |             | % | 3.60%  | 8.50%  | 14.50% | 24.20% | 49.10% | 100.00% | .006 .93     |
| LengCo                                                           | 1-5 years   | n | 1      | 5      | 8      | 12     | 6      | 32      |              |
|                                                                  |             | % | 3.10%  | 15.60% | 25.00% | 37.50% | 18.80% | 100.00% |              |
|                                                                  | 6-10 years  | n | 1      | 3      | 4      | 6      | 9      | 23      |              |
|                                                                  |             | % | 4.30%  | 13.00% | 17.40% | 26.10% | 39.10% | 100.00% |              |
|                                                                  | 11-15 years | n | 1      | 1      | 3      | 3      | 14     | 22      |              |
|                                                                  |             | % | 4.50%  | 4.50%  | 13.60% | 13.60% | 63.60% | 100.00% |              |
|                                                                  | 15+ years   | n | 6      | 8      | 20     | 23     | 27     | 84      |              |
|                                                                  |             | % | 7.10%  | 9.50%  | 23.80% | 27.40% | 32.10% | 100.00% |              |

| Rating (1 = <i>not indicative</i> , 5 = <i>very indicative</i> ) |             |   |        |        |        |        |        |         |          |     |
|------------------------------------------------------------------|-------------|---|--------|--------|--------|--------|--------|---------|----------|-----|
| Variable                                                         | Group       |   | 1      | 2      | 3      | 4      | 5      | Total   | $\tau_b$ | $p$ |
| Weakness                                                         | Total       | n | 9      | 17     | 35     | 44     | 56     | 161     |          |     |
|                                                                  |             | % | 5.60%  | 10.60% | 21.70% | 27.30% | 34.80% | 100.00% | .010     | .87 |
|                                                                  | 1-5 years   | n | 12     | 9      | 9      | 2      | 0      | 32      |          |     |
|                                                                  |             | % | 37.50% | 28.10% | 28.10% | 6.30%  | 0.00%  | 100.00% |          |     |
|                                                                  | 6-10 years  | n | 14     | 4      | 2      | 2      | 1      | 23      |          |     |
|                                                                  |             | % | 60.90% | 17.40% | 8.70%  | 8.70%  | 4.30%  | 100.00% |          |     |
|                                                                  | 11-15 years | n | 13     | 2      | 4      | 2      | 2      | 23      |          |     |
|                                                                  |             | % | 56.50% | 8.70%  | 17.40% | 8.70%  | 8.70%  | 100.00% |          |     |
|                                                                  | 15+ years   | n | 49     | 21     | 5      | 6      | 5      | 86      |          |     |
|                                                                  |             | % | 57.00% | 24.40% | 5.80%  | 7.00%  | 5.80%  | 100.00% |          |     |
| Vowel                                                            | Total       | n | 88     | 36     | 20     | 12     | 8      | 164     |          |     |
|                                                                  |             | % | 53.70% | 22.00% | 12.20% | 7.30%  | 4.90%  | 100.00% | -.088    | .17 |
|                                                                  | 1-5 years   | n | 1      | 0      | 5      | 10     | 16     | 32      |          |     |
|                                                                  |             | % | 3.10%  | 0.00%  | 15.60% | 31.30% | 50.00% | 100.00% |          |     |
|                                                                  | 6-10 years  | n | 0      | 1      | 4      | 9      | 9      | 23      |          |     |
|                                                                  |             | % | 0.00%  | 4.30%  | 17.40% | 39.10% | 39.10% | 100.00% |          |     |
|                                                                  | 11-15 years | n | 0      | 2      | 2      | 8      | 11     | 23      |          |     |
|                                                                  |             | % | 0.00%  | 8.70%  | 8.70%  | 34.80% | 47.80% | 100.00% |          |     |
|                                                                  | 15+ years   | n | 2      | 5      | 14     | 19     | 46     | 86      |          |     |
|                                                                  |             | % | 2.30%  | 5.80%  | 16.30% | 22.10% | 53.50% | 100.00% |          |     |
| Groping                                                          | Total       | n | 3      | 8      | 25     | 46     | 82     | 164     |          |     |
|                                                                  |             | % | 1.80%  | 4.90%  | 15.20% | 28.00% | 50.00% | 100.00% | .016     | .81 |
|                                                                  | 1-5 years   | n | 0      | 1      | 3      | 9      | 19     | 32      |          |     |
|                                                                  |             | % | 0.00%  | 3.10%  | 9.40%  | 28.10% | 59.40% | 100%    |          |     |
|                                                                  | 6-10 years  | n | 1      | 0      | 2      | 10     | 10     | 23      |          |     |
|                                                                  |             | % | 4.30%  | 0.00%  | 8.70%  | 43.50% | 43.50% | 100%    |          |     |
|                                                                  | 11-15 years | n | 0      | 1      | 4      | 8      | 10     | 23      |          |     |
|                                                                  |             | % | 0.00%  | 4.30%  | 17.40% | 34.80% | 43.50% | 100%    |          |     |
|                                                                  | 15+ years   | n | 3      | 2      | 9      | 34     | 38     | 86      |          |     |
|                                                                  |             | % | 3.50%  | 2.30%  | 10.50% | 39.50% | 44.20% | 100%    |          |     |
|                                                                  | Total       | n | 4      | 4      | 18     | 61     | 77     | 164     |          |     |
|                                                                  |             | % | 2.40%  | 2.40%  | 11.00% | 37.20% | 47.00% | 100.00% | -.075    | .28 |

\* $p < .05$ , \*\* $p < .01$ , \*\*\* $p < .001$ ; % = within group percent

NonSp = ability to perform nonspeech tasks; AudDis= auditory discrimination; OralMot = oral motor features; Pattern = patterns of errors; Incons = inconsistency; LengCo = lengthened coarticulation; Vowel = vowel errors.
