# Supplementary material
Source: publisher figshare collection journal article supplement (https://asha.figshare.com/articles/dataset/_/9755459)
Supplement: Supplementary file 4 [file 1]

**Supplemental Material S4.** Cross-tabulation of responses by years of experience to Item 18: For the following statements please rate your level of agreement.

| Variable | Group       | Rating (1 = <i>strongly disagree</i> , 5 = <i>strongly agree</i> ) |       |        |        |        | Total  | $\tau_b$ | <i>p</i>   |
|----------|-------------|--------------------------------------------------------------------|-------|--------|--------|--------|--------|----------|------------|
|          |             |                                                                    | 1     | 2      | 3      | 4      | 5      |          |            |
| ComPD    | 1-5 years   | n                                                                  | 0     | 3      | 6      | 22     | 1      | 32       |            |
|          |             | %                                                                  | 0.00% | 9.40%  | 18.80% | 68.80% | 3.10%  | 100.00%  |            |
|          | 6-10 years  | n                                                                  | 0     | 2      | 4      | 13     | 4      | 23       |            |
|          |             | %                                                                  | 0.00% | 8.70%  | 17.40% | 56.50% | 17.40% | 100.00%  |            |
|          | 11-15 years | n                                                                  | 0     | 3      | 2      | 13     | 4      | 22       |            |
|          |             | %                                                                  | 0.00% | 13.60% | 9.10%  | 59.10% | 18.20% | 100.00%  |            |
|          | 15+ years   | n                                                                  | 2     | 4      | 12     | 43     | 25     | 86       |            |
|          |             | %                                                                  | 2.30% | 4.70%  | 14.00% | 50.00% | 29.10% | 100.00%  |            |
|          | Total       | n                                                                  | 2     | 12     | 24     | 91     | 34     | 163      |            |
|          |             | %                                                                  | 1.20% | 7.40%  | 14.70% | 55.80% | 20.90% | 100.00%  | .162 .01** |
| ComASD   | 1-5 years   | n                                                                  | 2     | 1      | 2      | 12     | 15     | 32       |            |
|          |             | %                                                                  | 6.30% | 3.10%  | 6.30%  | 37.50% | 46.90% | 100.00%  |            |
|          | 6-10 years  | n                                                                  | 0     | 1      | 0      | 9      | 13     | 23       |            |
|          |             | %                                                                  | 0.00% | 4.30%  | 0.00%  | 39.10% | 56.50% | 100.00%  |            |
|          | 11-15 years | n                                                                  | 0     | 0      | 1      | 9      | 13     | 23       |            |
|          |             | %                                                                  | 0.00% | 0.00%  | 4.30%  | 39.10% | 56.50% | 100.00%  |            |
|          | 15+ years   | n                                                                  | 0     | 0      | 11     | 38     | 38     | 87       |            |
|          |             | %                                                                  | 0.00% | 0.00%  | 12.60% | 43.70% | 43.70% | 100.00%  |            |
|          | Total       | n                                                                  | 2     | 2      | 14     | 68     | 79     | 165      |            |
|          |             | %                                                                  | 1.20% | 1.20%  | 8.50%  | 41.20% | 47.90% | 100.00%  | -.049 .50  |
| ComDys   | 1-5 years   | n                                                                  | 1     | 5      | 9      | 12     | 5      | 32       |            |
|          |             | %                                                                  | 3.10% | 15.60% | 28.10% | 37.50% | 15.60% | 100.00%  |            |
|          | 6-10 years  | n                                                                  | 0     | 3      | 2      | 8      | 10     | 23       |            |
|          |             | %                                                                  | 0.00% | 13.00% | 8.70%  | 34.80% | 43.50% | 100.00%  |            |
|          | 11-15 years | n                                                                  | 1     | 1      | 3      | 11     | 7      | 23       |            |
|          |             | %                                                                  | 4.30% | 4.30%  | 13.00% | 47.80% | 30.40% | 100.00%  |            |
|          | 15+ years   | n                                                                  | 1     | 2      | 12     | 46     | 25     | 86       |            |
|          |             | %                                                                  | 1.20% | 2.30%  | 14.00% | 53.50% | 29.10% | 100.00%  |            |
|          | Total       | n                                                                  | 3     | 11     | 26     | 77     | 47     | 164      |            |
|          |             | %                                                                  | 1.80% | 6.70%  | 15.90% | 47.00% | 28.70% | 100.00%  | .140 .04*  |
| PreThree | 1-5         | n                                                                  | 0     | 4      | 17     | 7      | 3      | 32       |            |

| Variable | Group       | Rating (1 = <i>strongly disagree</i> , 5 = <i>strongly agree</i> ) |        |        |        |        |        | Total   | $\tau_b$ | <i>p</i> |
|----------|-------------|--------------------------------------------------------------------|--------|--------|--------|--------|--------|---------|----------|----------|
|          |             |                                                                    | 1      | 2      | 3      | 4      | 5      |         |          |          |
| PreVerb  | years       |                                                                    |        |        |        |        |        |         |          |          |
|          |             | %                                                                  | 0.00%  | 12.50% | 53.10% | 21.90% | 9.40%  | 100%    |          |          |
|          | 6-10 years  | n                                                                  | 0      | 6      | 9      | 5      | 2      | 23      |          |          |
|          |             | %                                                                  | 0.00%  | 26.10% | 39.10% | 21.70% | 8.70%  | 100%    |          |          |
|          | 11-15 years | n                                                                  | 1      | 4      | 7      | 6      | 5      | 23      |          |          |
|          |             | %                                                                  | 4.30%  | 17.40% | 30.40% | 26.10% | 21.70% | 100%    |          |          |
|          | 15+ years   | n                                                                  | 0      | 17     | 39     | 14     | 15     | 87      |          |          |
|          |             | %                                                                  | 0.00%  | 19.50% | 44.80% | 16.10% | 17.20% | 100%    |          |          |
|          | Total       | n                                                                  | 1      | 31     | 72     | 32     | 25     | 165     |          |          |
|          |             | %                                                                  | 0.60%  | 18.80% | 43.60% | 19.40% | 15.20% |         | .002     | .97      |
| Perm     | 1-5 years   | n                                                                  | 5      | 9      | 13     | 5      | 0      | 32      |          |          |
|          |             | %                                                                  | 15.60% | 28.10% | 40.60% | 15.60% | 0.00%  | 100.00% |          |          |
|          | 6-10 years  | n                                                                  | 6      | 11     | 2      | 2      | 1      | 22      |          |          |
|          |             | %                                                                  | 27.30% | 50.00% | 9.10%  | 9.10%  | 4.50%  | 100.00% |          |          |
|          | 11-15 years | n                                                                  | 8      | 9      | 2      | 4      | 0      | 23      |          |          |
|          |             | %                                                                  | 34.80% | 39.10% | 8.70%  | 17.40% | 0.00%  | 100.00% |          |          |
|          | 15+ years   | n                                                                  | 21     | 22     | 22     | 20     | 2      | 87      |          |          |
|          |             | %                                                                  | 24.10% | 25.30% | 25.30% | 23.00% | 2.30%  | 100.00% |          |          |
|          | Total       | n                                                                  | 40     | 51     | 39     | 31     | 3      | 164     |          |          |
|          |             | %                                                                  | 24.40% | 31.10% | 23.80% | 18.90% | 1.80%  | 100.00% | .038     | .55      |
| ExpVocab | 1-5 years   | n                                                                  | 2      | 11     | 15     | 4      | 0      | 32      |          |          |
|          |             | %                                                                  | 6.30%  | 34.40% | 46.90% | 12.50% | 0.00%  | 100.00% |          |          |
|          | 6-10 years  | n                                                                  | 0      | 10     | 10     | 2      | 1      | 23      |          |          |
|          |             | %                                                                  | 0.00%  | 43.50% | 43.50% | 8.70%  | 4.30%  | 100.00% |          |          |
|          | 11-15 years | n                                                                  | 2      | 10     | 5      | 6      | 0      | 23      |          |          |
|          |             | %                                                                  | 8.70%  | 43.50% | 21.70% | 26.10% | 0.00%  | 100.00% |          |          |
|          | 15+ years   | n                                                                  | 11     | 31     | 21     | 18     | 6      | 87      |          |          |
|          |             | %                                                                  | 12.60% | 35.60% | 24.10% | 20.70% | 6.90%  | 100.00% |          |          |
|          | Total       | n                                                                  | 15     | 62     | 51     | 30     | 7      | 165     |          |          |
|          |             | %                                                                  | 9.10%  | 37.60% | 30.90% | 18.20% | 4.20%  | 100.00% | .002     | .98      |

| Variable | Group       | Rating (1 = <i>strongly disagree</i> , 5 = <i>strongly agree</i> ) |       |        |        |        |        | Total   | $\tau_b$ | $p$ |
|----------|-------------|--------------------------------------------------------------------|-------|--------|--------|--------|--------|---------|----------|-----|
|          |             | 1                                                                  | 2     | 3      | 4      | 5      |        |         |          |     |
|          |             | %                                                                  | 8.70% | 8.70%  | 39.10% | 34.80% | 8.70%  | 100.00% |          |     |
|          | 11-15 years | n                                                                  | 0     | 9      | 3      | 7      | 4      | 23      |          |     |
|          |             | %                                                                  | 0.00% | 39.10% | 13.00% | 30.40% | 17.40% | 100.00% |          |     |
|          | 15+ years   | n                                                                  | 7     | 14     | 20     | 38     | 7      | 86      |          |     |
|          |             | %                                                                  | 8.10% | 16.30% | 23.30% | 44.20% | 8.10%  | 100.00% |          |     |
|          | Total       | n                                                                  | 9     | 27     | 44     | 68     | 16     | 164     |          |     |
|          |             | %                                                                  | 5.50% | 16.50% | 26.80% | 41.50% | 9.80%  | 100.00% | -.055    | .37 |

\* $p < .05$ , \*\* $p < .01$ , \*\*\* $p < .001$ ; % = within group percentage.

CoPd= CAS can co-occur with phonological disorder; CoASD = CAS can co-occur with ASD; CoDys = CAS can co-occur with dysarthria; Under3 = CAS and phonological disorder are easily distinguishable in children under age 3; Pre-verb = CAS can be diagnosed in preverbal children; Perm = CAS is a permanent condition; ExpVoc = It is important to consider total expressive vocabulary in relation to number of sounds in phonemic inventory.
